# Supplementary material for: Next-Generation Sequencing of RNA and DNA Isolated from Paired Fresh-Frozen and Formalin-Fixed Paraffin-Embedded Samples of Human Cancer and Normal Tissue
Source: PLoS One. 2014 May 30;9(5):e98187. doi: 10.1371/journal.pone.0098187 (PMC4039489; doi:10.1371/journal.pone.0098187)
Supplement: Table S1 — Detailed information on the sample sets. (XLSX) [file pone.0098187.s015.xlsx]

## Sheet: The test set
Patient ID	Tissue	Gender	Histology	FFPE_FF	Fixation time (hours)	Storage time (months)
T1	Liver	male	Normal	FF	24	1
T2	Liver	female	Normal	FF	24	2
T1	Liver	female	Normal	FFPE	24	1
T2	Liver	female	Normal	FFPE	24	3
T3	Liver	male	Carcinoma	FF	24	1
T3	Liver	male	Carcinoma	FFPE	24	1
T4	Tonsil	male	Reactive	FF	24	1
T4	Tonsil	male	Reactive	FFPE	24	1
T5	Lung	male	Carcinoma	FFPE	24	5
T6	Lung	female	Carcinoma	FFPE	24	14
T7	Breast	female	Carcinoma	FFPE	24	2
T8	Breast	female	Carcinoma	FFPE	24	3
T9	Breast	female	Normal skin	FFPE	24	2
T10	Breast	female	Normal skin	FFPE	24	3
T11	Bladder	female	Carcinoma	FFPE	24	1
T12	Bladder	female	Carcinoma	FFPE	24	12

## Sheet: The storage time FFPE set
Patient ID	Tissue	Gender	Storage time (months)
SB1	Bladder carcinoma	male	2
SB2	Bladder carcinoma	male	13
SB3	Bladder carcinoma	female	62
SB4	Bladder carcinoma	male	241
SC1	Colon carcinoma	male	3
SC2	Colon carcinoma	male	15
SC3	Colon carcinoma	female	60
SC4	Colon carcinoma	male	244
SL1	Liver	male	3
SL2	Liver	male	15
SL3	Liver	female	60
SL4	Liver	male	244
ST1	Tonsil	male	2
ST2	Tonsil	male	13
ST3	Tonsil	female	62
ST4	Tonsil	male	241

## Sheet: The paired FF-FFPE colon set
Patient ID	Storage time (years)	Tumor or normal	MSI_Status	Malignant, benign or normal	Gender	FFPE_FF	RNA-Seq Dnase+Exo	RNA-Seq Library prepared	DNA-Exome Library prepared
C1	13	T	MSS	M	male	FF		yes	no
C1	13	T	MSS	M	male	FFPE	DNase I	yes	no
C1	13	T	MSS	M	male	FFPE	DNase I + ExoI	yes	no
C2	11	T	MSS	M	female	FF		yes	yes
C2	11	T	MSS	M	female	FFPE	DNase I	yes	yes
C2	11	T	MSS	M	female	FFPE	DNase I + ExoI	yes	no
C3	11	T	MSI high	M	male	FF		yes	no
C3	11	T	MSI high	M	male	FFPE	DNase I	yes	no
C4	11	N	MSS	N	male	FF		yes	no
C4	11	T	MSS	M	male	FF		yes	yes
C4	11	T	MSS	M	male	FFPE	DNase I	yes	yes
C5	7	T	MSS	B	female	FF		yes	no
C5	7	T	MSS	B	female	FFPE	DNase I	yes	no
C5	7	T	MSS	B	female	FFPE	DNase I + ExoI	yes	no
C6	7	T	MSS	B	male	FF		yes	yes
C6	7	T	MSS	B	male	FFPE	DNase I	yes	yes
C7	7	T	MSS	M	female	FF		yes	no
C7	7	T	MSS	M	female	FFPE	DNase I	yes	no
C8	7	N	MSS	N	female	FF		yes	no
C8	7	T	MSS	M	female	FF		yes	yes
C8	7	T	MSS	M	female	FFPE	DNase I	yes	yes
C9	7	N	MSS	N	male	FF		yes	no
C9	7	T	MSS	B	male	FF		yes	no
C9	6	T	MSS	B	male	FFPE	DNase I	yes	no
C9	6	T	MSS	B	male	FFPE	DNase I + ExoI	yes	no
C10	3	N	Unknown	N	female	FF		yes	no
C10	3	T	Unknown	M	female	FF		yes	yes
C10	3	T	Unknown	M	female	FFPE	DNase I	yes	yes
C11	3	N	Unknown	N	male	FF		yes	no
C11	3	T	Unknown	M	male	FF		yes	no
C11	3	T	Unknown	M	male	FFPE	DNase I	yes	no
C12	3	N	MSS	N	female	FF		yes	no
C12	3	T	MSS	M	female	FF		yes	no
C12	3	T	MSS	M	female	FFPE	DNase I	yes	no
C13	3	N	Unknown	N	male	FF		yes	no
C13	3	T	Unknown	M	male	FF		yes	yes
C13	3	T	Unknown	M	male	FFPE	DNase I	yes	yes
C13	3	T	Unknown	M	male	FFPE	DNase I + ExoI	yes	no
C14	3	N	Unknown	N	female	FF		yes	no
C14	3	T	Unknown	M	female	FF		yes	yes
C14	3	T	Unknown	M	female	FFPE	DNase I	yes	yes
C15	2	N	MSS	N	male	FF		yes	no
C15	2	T	MSS	M	male	FF		yes	yes
C15	2	T	MSS	M	male	FFPE	DNase I	yes	yes
C16	2	N	Unknown	N	male	FF		yes	no
C16	2	T	Unknown	M	male	FF		yes	no
C16	2	T	Unknown	M	male	FFPE		yes	no
C17	2	N	MSS	N	female	FF		yes	no
C17	2	T	MSS	M	female	FF		yes	yes
C17	2	T	MSS	M	female	FFPE	DNase I	yes	yes
C18	2	N	Unknown	N	female	FF		yes	no
C18	2	T	Unknown	M	female	FF		yes	yes
C18	2	T	Unknown	M	female	FFPE	DNase I	yes	yes
C18	2	T	Unknown	M	female	FFPE	DNase I + ExoI	yes	no
C19	2	N	MSS	N	male	FF		yes	no
C19	2	T	MSS	M	male	FF		yes	no
C19	2	T	MSS	M	male	FFPE	DNase I	yes	no

## Sheet: The KRAS-BRAF variants set
PatientID	Storage time (months)	Gender	BRAF-15 C.1799T>A het (P.Val600Glu)	BRAF-11 C.1432+10T>C	KRAS C.59C>T het(P.Thr20Met)	KRAS C.34G>A het(P.Gly12Ser)	KRAS C.34G>T het(P.Gly12Cys)
C20	69	female	MUT	MUT	WT	WT	WT
C21	46	male	MUT	WT	WT	WT	WT
C22	49	female	MUT	WT	WT	WT	WT
C23	39	female	MUT	WT	MUT	WT	WT
C24	49	female	MUT	WT	WT	WT	WT
C25	40	male	MUT	WT	WT	WT	WT
C26	76	male	MUT	WT	WT	WT	WT
C27	53	female	MUT	WT	WT	WT	WT
C28	14	female	NA	NA	WT	WT	WT
C29	6	male	NA	NA	WT	WT	MUT
C30	27	male	NA	NA	WT	MUT	WT

## Sheet: The paired FF-FFPE prostate set
PatientID	Gender	FF-FFPE	Storage time (years)
P1	male	FF	11
P1	male	FFPE	11
P2	male	FF	3
P2	male	FFPE	3
P3	male	FF	3
P3	male	FFPE	3
P4	male	FF	2
P4	male	FFPE	2
P5	male	FF	2
P5	male	FFPE	2
P6	male	FF	2
P6	male	FFPE	2
P7	male	FF	2
P7	male	FFPE	2

## Sheet: The paired FF-FFPE bladder set
Patient ID	Stage and grade	Gender	FF-FFPE	Storage time (years)
B11	TagII	female	FF	9
B11	TagII	female	FFPE	9
B11	T2gII	female	FF	6
B11	T2gII	female	FFPE	6
B12	TagII	male	FF	8
B12	TagII	male	FFPE	8
B12	T1gII	male	FF	7
B12	T1gII	male	FFPE	7
B13	T1gIII	female	FF	7
B13	T1gIII	female	FFPE	7
B14	TagII	female	FF	7
B14	TagII	female	FFPE	7
B14	T1gIII	female	FF	6
B14	T1gIII	female	FFPE	6
B15	T2grIII	male	FF	5
B15	T2grIII	male	FFPE	5

## Sheet: The FF bladder set
PatientID	Progression	Gender	FF-FFPE
B1	no	male	FF
B2	no	male	FF
B3	no	male	FF
B4	yes	female	FF
B5	yes	male	FF
B6	no	male	FF
B7	no	male	FF
B8	yes	male	FF
B9	no	male	FF
B10	no	male	FF
