# Supplementary material for: Next-Generation Sequencing of RNA and DNA Isolated from Paired Fresh-Frozen and Formalin-Fixed Paraffin-Embedded Samples of Human Cancer and Normal Tissue
Source: PLoS One. 2014 May 30;9(5):e98187. doi: 10.1371/journal.pone.0098187 (PMC4039489; doi:10.1371/journal.pone.0098187)
Supplement: Table S2 — Summarised information on isolated RNA and DNA from the different sample sets. (XLSX) [file pone.0098187.s016.xlsx]

## Sheet: RNA test set
	Patient ID	T1	T2	T3	T4	T11	T12	T5	T6	T7	T8	T9	T10
		liver #1	liver #2	liver car	tonsil	Bladder #1	Bladder #2	Lung #1	Lung #2	Breast car #1	Breast car #2	Breast skin #1	Breast skin #2
	miRNeasy FFPE kit	12.7342	5.8287	8.52952	12.6851	3.8207	8.261	9.453	13.265	1.2426	2.0156	0.22805	0.1225
	NucleoSpin FFPE RNA	0.23475	0.1931	0.59055	0.792825	0.63727	0.69179	3.7113	1.4515	0.7624	0.14578	0.09218	0.028307
	NucleoSpin FFPE DNA/RNA (RNA)	0.4372		1.866	1.9554
	Amp Tec, ExpressArt FFPE RNAready	5.9925		6.8956	3.8688	9.651	13.941	13.557	14.175	3.2478	3.5933	0.15027	0.10265
	QIAsymphony	4.7025	2.0151		5.337	4.4595	5.3955	4.1835	11.9925	0.7611	0.6003	0.033945	0.013788
	RecoverAll					3.1257	4.415	7.307	7.995	2.4366	2.55165	0.2073	0.04359
	FF RNA	0.5125	3.00117	2.45817	2.974
	Average yield (µg)

## Sheet: DNA test set
		Patient ID	T1	T2	T3	T4	T11	T12	T5	T6	T7	T8	T9	T10
			Liver #1	Liver #2	Liver car	Tonsil	Bladder #1	Bladder #2	Lung #1	Lung #2	Breast car #1	Breast car #2	Breast skin #1	Breast skin #2	Average
FFPE	QIAamp FFPE DNA	QuBit [ng]	1435	Not measured	6120	Not measured	718	4230	2509	2671	473	580.2	69.7	36.4
		Nanodrop [ng]	6367.6	3451.8	11933.5	7259.8	2595.5	10403.5	6314.5	9701.5	1222.5	1775.5	200	136
		% dsDNA	25.1554	N/A	50.9908	N/A	27.7307	40.4886	39.2389	27.7544	39.1855	31.5351	37.3098	27.4112	34.6801
	Nucleospin FFPE DNA	QuBit [ng]	Not measured	Not measured	399.6	1020	314.4	488	391	429	189.6	230.5	53	0
		Nanodrop [ng]	2053.6	1814.3	2629.8	4453.7	2864	7306	7232.5	6057	3833	4227	650.5	168.5
		% dsDNA	N/A	N/A	14.84	22.7446	10.9725	6.66928	5.46057	7.03826	4.98406	5.45712	8.73324	0	8.68996
	Nucleospin FFPE RNA/DNA	QuBit [ng]	0		0	0
		Nanodrop [ng]	946.4		58.9	107.8
		% dsDNA	0		0	0									0
	RecoverAll Total Nucleic Acid Isolation Kit, DNA method	QuBit [ng]					932	3290	1938	2781	411	352.5	0	0
		Nanodrop [ng]					2008	5299	4037	5177	681.75	590.25	57.75	62.25
		% dsDNA					46.677	62.3466	48.3586	54.2505	60.5134	59.7417	0	0	41.486
	QIAsymphony DSP DNA Mini Kit	QuBit [ng]					1146	4200	4960	2482	288.3	106.2	52	10.9
		Nanodrop [ng]					4268	10311	12423.5	9469	792	289.5	139	132.5
		% dsDNA					26.86	40.738	39.9031	26.2874	37.4102	38.4456	37.4074	6.31884	31.6713
FF	FF DNA (QIAsymphony DSP DNA Mini Kit)	QuBit [ng]	956	Not measured	1776.67	1620
		Nanodrop [ng]	1375.33	1644.67	2364	2241
		% dsDNA	69.9342	N/A	76.0487	72.2915									72.7581

## Sheet: RNA storage time FFPE set
	Tissue	Bladder Carcinoma				Colon Carcinoma				Liver (non-neo-plastic)				Tonsil (reactive)
	Patient ID	SB1	SB2	SB3	SB4	SC1	SC2	SC3	SC4	SL1	SL2	SL3	SL4	ST1	ST2	ST3	ST4
	Storage time (months)	2	13	62	241	3	15	60	244	3	15	60	244	2	13	62	241
	miRNeasy	1.45635	14.817	5.9586	0.84345	5.421	13.2285	4.0335	16.8165	5.5005	14.8785	3.9045	19.1685	14.754	9.057	19.389	19.599
	AmpTec	0.23508	12.1845	8.1765	0.239175	5.4225	18.1365	2.28975	24.0075	6.288	31.515	3.62055	26.3835	13.476	14.244	24.9255	21.6165
	Average yield (Nanodrop, µg)

## Sheet: DNA storage time FFPE set
	Tissue	Bladder Carcinoma				Colon Carcinoma				Liver (non-neo-plastic)				Tonsil (reactive)
	Patient ID	SB1	SB2	SB3	SB4	SC1	SC2	SC3	SC4	SL1	SL2	SL3	SL4	ST1	ST2	ST3	ST4
	Storage time (months)	2	13	62	241	3	15	60	244	3	15	60	244	2	13	62	241	Average
QIAamp FFPE DNA	dsDNA (ng, Qubit)	1.2825	8.1	1.9725	0.11745	8.31	7.395	11.265	0.25935	3.1815	3.63	5.115	0.3495	20.55	14.76	9.15	2.307
	total DNA (ng, Nanodrop)	4.143	13.8255	5.43	0.3993	18.504	15.0075	28.551	0.89415	10.8885	7.4085	14.178	1.2021	39.315	33.42	27.2355	6.0948
	% dsDNA	30.9558	58.5874	36.326	29.414	44.9092	49.2754	39.4557	29.0052	29.2189	48.9978	36.077	29.0741	52.2701	44.1652	33.5959	37.8519	39.3237
RecoverAll Total Nucleic Acid Isolation Kit, DNA method	QuBit [µg]	0.3435	1.1475	0.981	0	3.2265	2.664	13.05	0.08925	3.075	3.2865	7.305	0.19665	6.045	4.23	3.0645	1.7385
	dsDNA (ng, Qubit)	1.0758	3.0468	2.2701	11.2335	5.5635	5.874	28.539	1.13145	5.5215	7.167	14.5845	1.57095	7.923	6.777	11.2335	7.0695
	total DNA (ng, Nanodrop)	31.9297	37.6625	43.214	0	57.9941	45.3524	45.7269	7.88811	55.6914	45.856	50.0874	12.5179	76.2969	62.417	27.28	24.5916	39.0316

## Sheet: DNA paired colon set
	Patient ID	C1	C2	C3	C4	C5	C6	C7	C8	C9	C10	C11	C12	C13	C14	C15	C16	C17	C18	C19
	Year	1999	2001	2001	2001	2005	2005	2005	2005	2006	2009	2009	2009	2009	2009	2010	2010	2010	2010	2010
	Number of purifications	4	2	3	3	4	2	2	2	4	2	2	4	2	2	2	2	2	2	4
	dsDNA (ng, Qubit)	2129.7	4908	517.5	3142.2	1149.6	1611	1563	1329	726.3	11670	1594.2	1877.4	2106	6810	4200	2316	1290	3735	2379
	total DNA (ng, Nanodrop)	4090.5	11820	1260.96	7310.4	3396.9	3977.1	3513	3420.6	1547.1	25587	3106.71	3648.3	3691.2	14844	10161	5127.3	2575.5	7608	4239.6
	% dsDNA	52.0645	41.5228	41.0402	42.9826	33.8426	40.5069	44.4919	38.8528	46.9459	45.6091	51.3147	51.4596	57.0546	45.8771	41.3345	45.17	50.0874	49.0931	56.1138

## Sheet: RNA paired colon set
	Patient ID	C1	C2	C3	C4	C5	C6	C7	C8	C9	C10	C11	C12	C13	C14	C15	C16	C17	C18	C19
	Year	1999	2001	2001	2001	2005	2005	2005	2005	2006	2009	2009	2009	2009	2009	2010	2010	2010	2010	2010
	Number of purifications	2	2	2	2	2	2	2	2	2	2	2	2	2	2	2	2	2	2	2
	DNase I (ng, Nanodrop)	6114	16695	5682	21981	8616	10896	22299	7626	7785	15264	3525	7692	7497	13053	11661	7791	6357	9675	5586
	Dnase I + EXO I (ng, Nanodrop)	9498	17037	5604	20844	8925	11859	17760	6732	6975	13182	5145	2851.5	7536	6627	9045	5712	4539	8307	1760.1
	Total (ng, Nanodrop)	15612	33732	11286	42825	17541	22755	40059	14358	14760	28446	8670	10543.5	15033	19680	20706	13503	10896	17982	7346.1

## Sheet: DNA paired bladder set
	Patient ID_stage	B11_Ta	B11_T2	B12_Ta	B12_T1	B13_T1	B14_Ta	B14_T1	B15_T2
	Year	2003	2006	2004	2005	2005	2005	2006	2007
	Number of duplicate purifications	4	4	3	3	3	3	3	4
	dsDNA (ng, Qubit)	444	858.3	1073.7	2580	1437	1509	1764	1050.7
	total DNA (ng, Nanodrop)	N/A	N/A	2193.9	5485.8	3068.7	2376.3	4428	N/A
	% dsDNA*	34.5382	56.5607	48.9402	47.0305	46.8276	63.5021	39.8374	35.3293
	*For samples with 4 purification replicates conentration was only measured on Nanodrop for 2 purification replicates. The value given is based on the ratio of QuBit to Nanodrop concentrations for the duplicate purifications

## Sheet: RNA paired bladder set
	Patient ID_stage	B11_Ta	B11_T2	B12_Ta	B12_T1	B13_T1	B14_Ta	B14_T1	B15_T2
	Year	2003	2006	2004	2005	2005	2005	2006	2007
	Number of duplicate purifications	2	2	2	2	2	2	2	2
	DNase I (ng, Nanodrop)	19947	1172	23073	1956	14562	8154	2578	17652

## Sheet: DNA paired prostate set
	Patient ID	P1	P2	P3	P4	P5	P6	P7
	Year	2001	2001	2009	2009	2010	2010	2010
	Number of duplicate purifications	4	4	4	4	2	4	2
	dsDNA (ng, Qubit)	768.9	2086.2	1157.4	3557.7	2064	4621.2	8868
	total DNA (ng, Nanodrop)	N/A	N/A	N/A	N/A	7380	N/A	18078
	% dsDNA*	36.8691	36.3785	23.2515	41.4554	27.9675	44.0307	49.0541
	*For samples with 4 purification replicates conentration was only measured on Nanodrop for 2 purification replicates. The value given is based on the ratio of QuBit to Nanodrop concentrations for the duplicate purifications

## Sheet: RNA paired prostate set
	Patient ID	P1	P2	P3	P4	P5	P6	P7
	Year	2001	2009	2009	2010	2010	2010	2010
	Number of duplicate purifications	2	2	2	2	2	2	2
	DNase I (ng, Nanodrop)	3324	15039	1822	4758	3507	3570	3855
	Dnase I + EXO I (ng, Nanodrop)	1300	14340	2382	2720	4443	4722	4305
	Total (ng, Nanodrop)	4624	4204	29379	7478	7950	8292	8160
