# Supplementary material for: Next-Generation Sequencing of RNA and DNA Isolated from Paired Fresh-Frozen and Formalin-Fixed Paraffin-Embedded Samples of Human Cancer and Normal Tissue
Source: PLoS One. 2014 May 30;9(5):e98187. doi: 10.1371/journal.pone.0098187 (PMC4039489; doi:10.1371/journal.pone.0098187)
Supplement: Table S3 — Summary of the DNA-Exome-Seq data from ten FF/FFPE pairs from the paired FF/FFPE colon set . (XLSX) [file pone.0098187.s017.xlsx]

## Sheet: Ark1
Patient ID	C2	C2	C4	C4	C6	C6	C8	C8	C10	C10	C13	C13	C14	C14	C15	C15	C17	C17	C18	C18
FF_FFPE	FF	FFPE	FF	FFPE	FF	FFPE	FF	FFPE	FF	FFPE	FF	FFPE	FF	FFPE	FF	FFPE	FF	FFPE	FF	FFPE
Year	2001	2001	2001	2001	2005	2005	2005	2005	2009	2009	2009	2009	2009	2009	2010	2010	2010	2010	2010	2010
Exome_Library_ID1	b8 HTF_exome_98	b8 HTF_exome_104	b5 HTF_79 / HTF_batch5_FF1	b5 HTF_68 / HTF_batch5_FFPE1	b5 HTF_81 / HTF_batch5_FF2	b5 HTF_70 / HTF_batch5_FFPE2	b5 HTF_83 / HTF_batch5_FF3	b5 HTF_72 / HTF_batch5_FFPE3	b8 HTF_exome_100	b8 HTF_exome_106	b8 HTF_exome_99	b8 HTF_exome_105	b8 HTF_exome_101	b8 HTF_exome_107	b8 HTF_exome_102	b8 HTF_exome_108	b5 HTF_87 / HTF_batch5_FF4	b5 HTF_76 / HTF_batch5_FFPE4	b8 HTF_exome_103	b8 HTF_exome_109
Exome_Library_ID2	FF_HTF531	HTF531	FF1	FFPE1	FF2	FFPE2	FF3	FFPE3	FF_HTF547	HTF547	FF_HTF552	HTF552	FF_HTF554	HTF554	FF_HTF556	HTF556	FF4	FFPE4	FF_HTF562	HTF562
Exome_Library_ID3	N084-01	N084-02	N084-03	N084-04	N084-05	N084-06	N084-07	N084-08	N084-09	N084-10	N084-11	N084-12	N084-13	N084-14	N084-15	N084-16	N084-17	N084-18	N084-19	N084-20
RNA-Seq_Library	N040-04	N040-05	N040-10	N040-11	N040-23	N040-24	NA	NA	NA	NA	N040-20	N040-21	NA	NA	NA	NA	N040-49	N040-50	N040-52	N040-53
Total reads	132820410	346372372	147827636	196616606	131718412	287990120	147799440	263552644	143364150	213548778	170169686	200564528	159010346	188565574	143400290	214540158	101180794	288425490	137832060	226390870
Mapped	130087672	307422659	144275421	179381858	128627036	271527189	144833878	253302022	140876485	205253692	167030824	188372981	156145427	180505026	140900996	209066896	98930061	281235684	135598953	220835327
Percentage duplicates	7.7	49.1	11.2	34.2	10.3	35.2	11.6	29.6	8.1	29.8	8.7	32.3	8.4	30.2	8.1	26.2	10.3	28.1	7.6	27.6
Variants	50491	75850	49022	75596	49325	59720	48202	54196	60199	53620	51017	52625	48914	51118	49343	52637	47706	49053	49976	51855
Average coverage	90.5	37.8	91.7	57.5	84.6	86.6	92	97.6	95.5	77.5	114.2	64.4	106.9	67.8	97.8	89.7	64.6	110.5	94.8	90.9
Unique variants	14675	38846	12265	38736	7593	17889	5869	11774	12058	5480	4659	6262	4488	6622	3104	6347	5888	7153	3181	5003
Shared variants	35267	35267	36319	36319	41355	41355	41939	41939	47607	47607	45856	45856	43942	43942	45782	45782	41462	41462	46275	46275
									65145
Percent mapped	97.9425	88.755	97.5971	91.2343	97.653	94.2835	97.9935	96.1106	98.2648	96.1156	98.1555	93.9214	98.1983	95.7253	98.2571	97.4488	97.7755	97.5072	98.3798	97.546
